# Supplementary material for: Follicular helper-T cells restore CD8+-dependent antitumor immunity and anti-PD-L1/PD-1 efficacy
Source: PubMed Central journal article supplement — J Immunother Cancer. 2021 Jun 8;9(6):e002157. doi: 10.1136/jitc-2020-002157 (PMC8190041; doi:10.1136/jitc-2020-002157), 2021-06-08
Supplement: jitc-2020-002157supp001.pdf [file jitc-2020-002157supp001.pdf]

Fig. S1

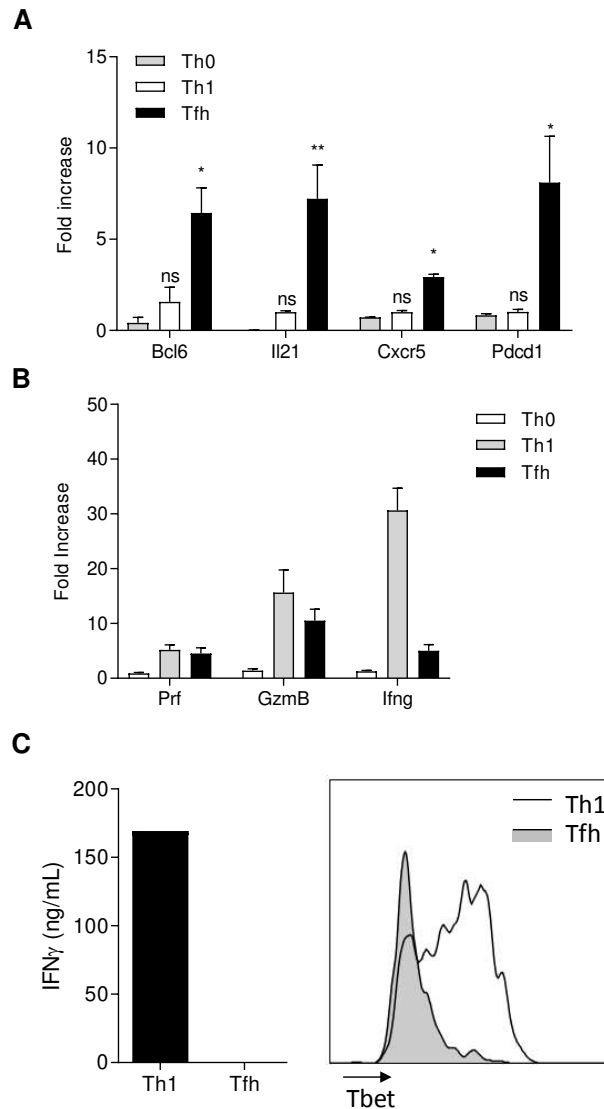

Fig.S1. Tfh phenotype. **A**, Bcl6, Il21, Cxcr5 and Pdcd1 mRNA expression in *in vitro* polarized Th0, Th1 and Tfh cells. **B**, (Perforin) Prf, (granzyme B) GzmB, and Ifng mRNA expression in *in vitro* polarized Th0, Th1 and Tfh cells. **C**, IFN $\gamma$  (ELISA) and Tbet (ICS flow cytometry) expression in *in vitro* polarized Th1 and Tfh. Indicated values represent the mean  $\pm$  SEM and are representative of at least three independent experiments; ns: not significant, \*  $p < 0.05$ , \*\*  $p < 0.01$ , versus “Th0”.

Fig. S2

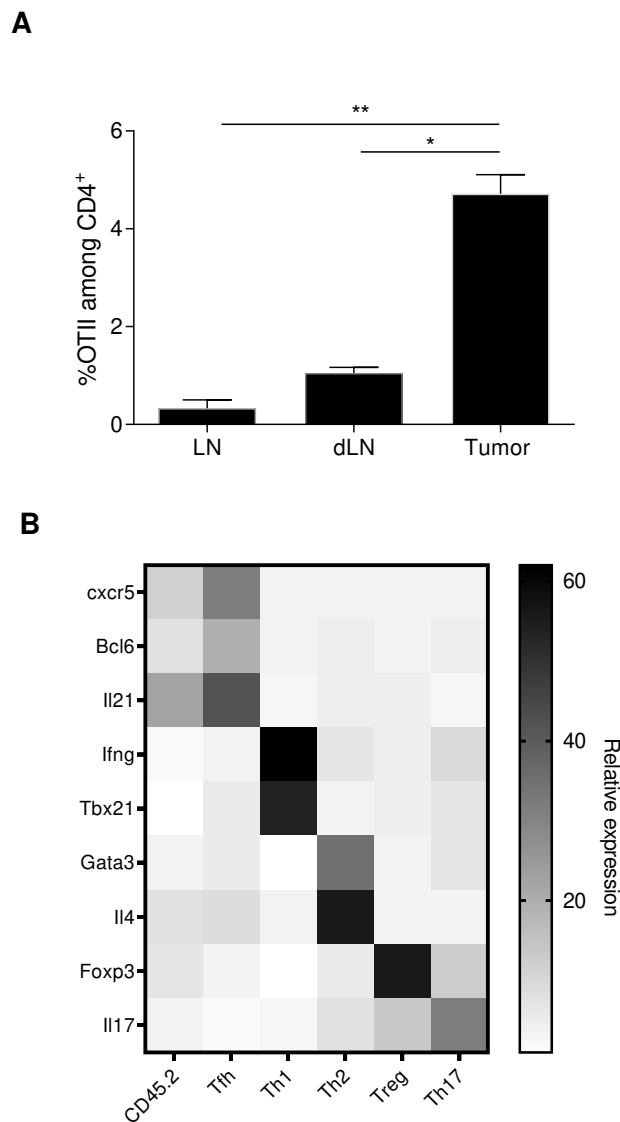

Fig. S2. T cell localization and gene expression after transfer. **A**, Percentage of CD45.2 cells among CD4<sup>+</sup> T cells measured by flow cytometry in non-draining lymph node (LN), draining lymph node (dLN) and tumor from MC38 tumor bearing mice. **B**, Cxcr5, Bcl6, Il21, Ifng, Tbx21, Gata3, Il4, Il17 and Foxp3 mRNA expression in CD45.2 sorted cells. Indicated values represent the mean  $\pm$  SEM and are representative of at least three independent experiments; \*  $p < 0.05$ , \*\*  $p < 0.01$ .

Fig. S3

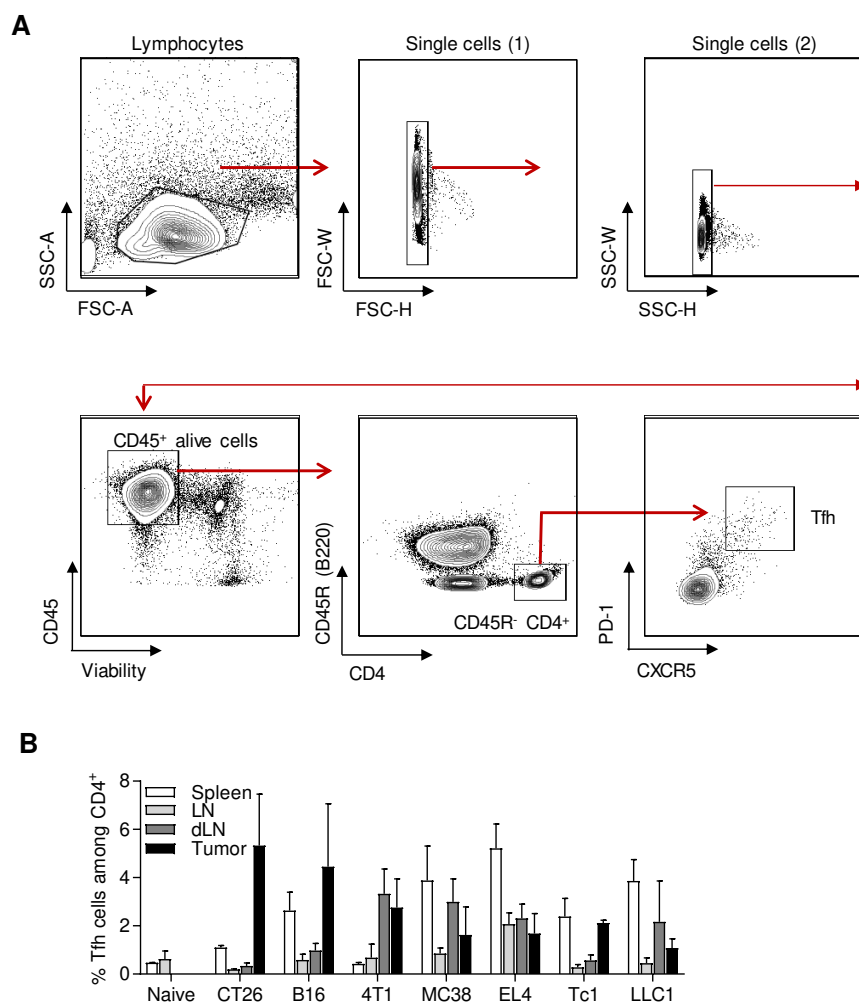

Fig. S3. Flow cytometry gating strategy to identify mouse Tfh cells. **A**, Flow cytometry gating strategy. **B**, Relative to figure 2B. Wild-type mice were inoculated with EL4 lymphoma, B16F-10 melanoma, LLC1 lung adenocarcinoma, Tc1 non-small cell lung cancer or MC38 colorectal carcinoma (C57BL/6 mice) or CT26 colorectal carcinoma, 4T1 triple negative breast cancer (Balb/c mice). When tumors reached 100-150 mm<sup>2</sup>, the spleen, non-draining lymph node (ndLN), tumor-draining lymph node (dLN) and tumor were excised. The percentage of Tfh among CD4<sup>+</sup> T cells was analyzed by flow cytometry.

Fig. S4

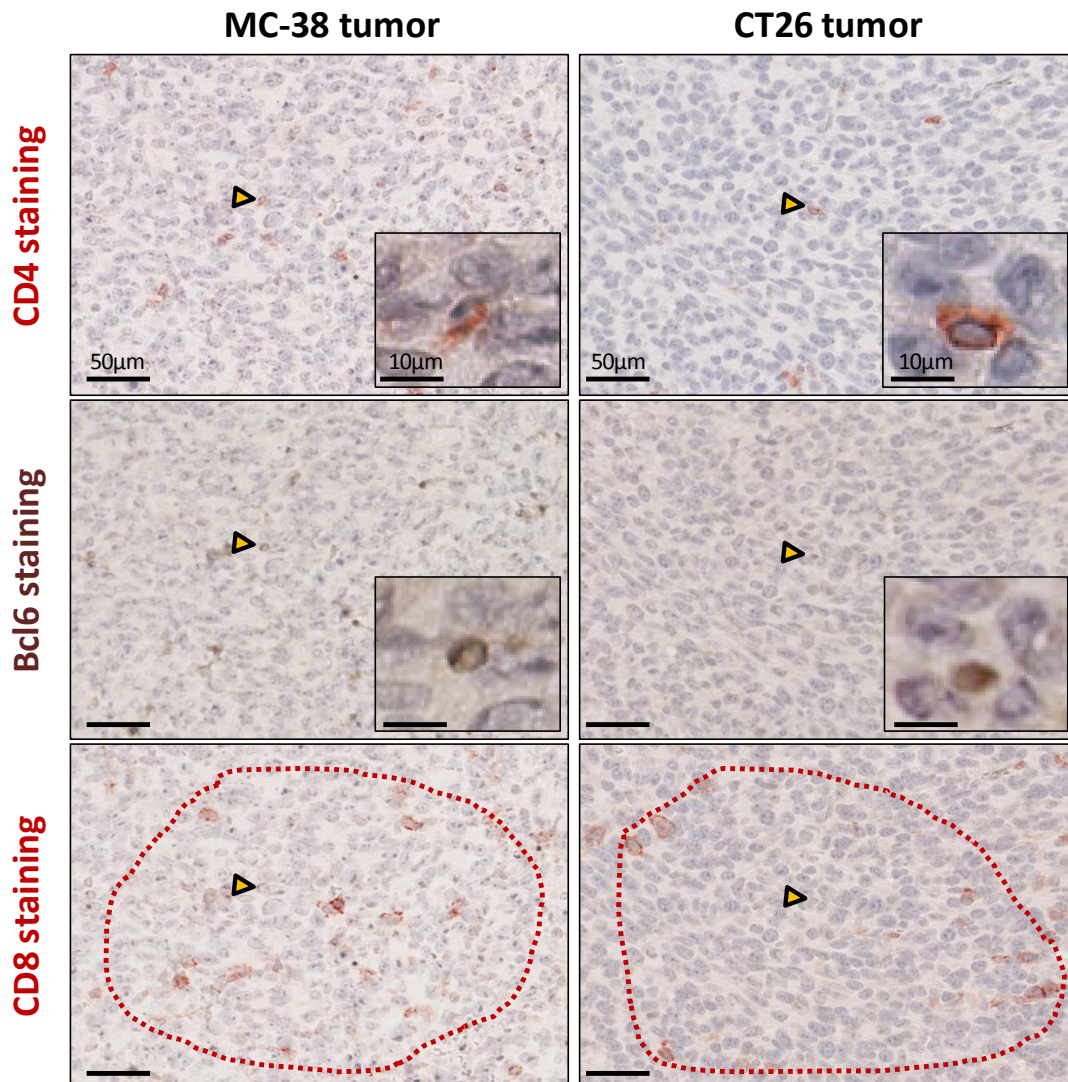

Fig. S4. Tfh localization within TLS. MC38 and CT26 tumor serial sections were stained with anti-CD4, anti-BCL6 and anti-CD8 antibodies and analyzed by immunohistochemistry.

Arrow: enlarge image; dotted red line: TLS.

Fig. S5

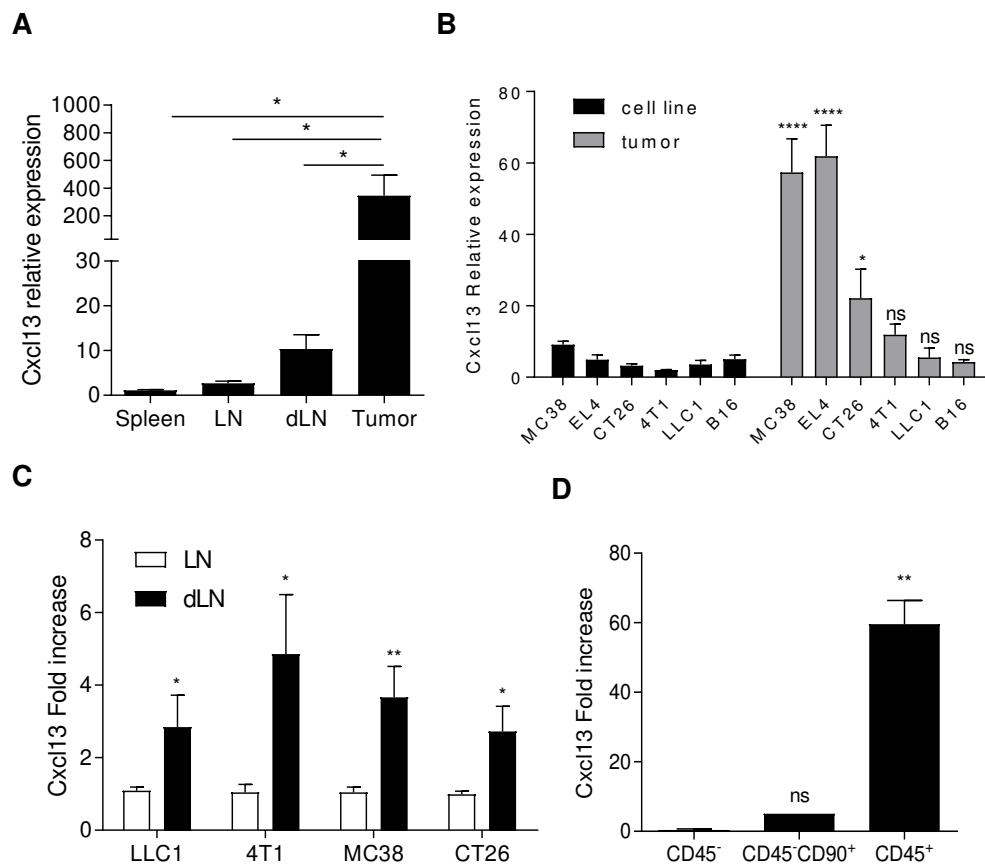

Fig. S5. Cxcl13 expression in tumor and non-tumor cells. Cxcl13 expression was analyzed by RT-PCR. **A**, Expression of Cxcl13 in CD8<sup>+</sup> cells sorted from Spleen, LN, dLN and tumor from MC38 tumor bearing mice. **B**, Expression of Cxcl13 in CT26, 4T1, B16-F10, MC38, LLC1 and EL4 cancer cell lines and in tumors from tumor bearing mice injected with CT26, 4T1, B16-F10, MC38, LLC1 and EL4 cell lines. **C**, Expression of Cxcl13 in LN and dLN from LLC1, 4T1, MC38 and CT26 tumor bearing mice. **D**, Cxcl13 expression in CD45<sup>-</sup> cells, CD45<sup>-</sup> CD90<sup>+</sup> cells and CD45<sup>+</sup> cells sorted by flow cytometry from MC38 tumor bearing mice. Indicated values represent the mean  $\pm$  SEM and are representative of at least three independent experiments; ns: not significant, \* < 0.05, \*\* p < 0.01, \*\*\*\* p < 0.0001, versus “spleen” in **A** versus “cell line” in **B** and versus “CD45<sup>-</sup>” in **D**.

Fig. S6

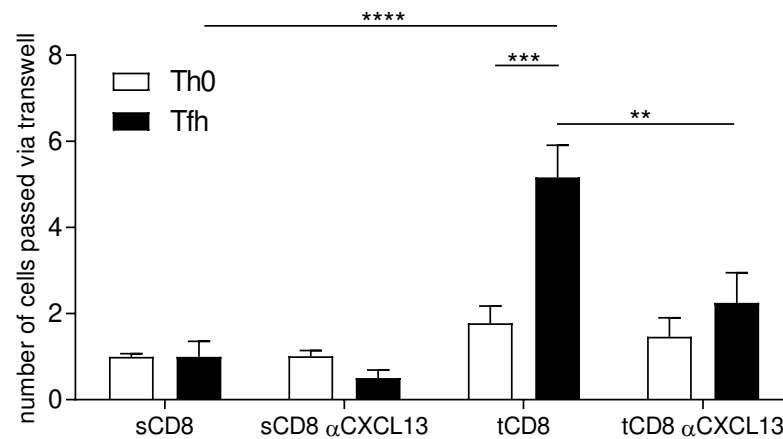

Fig. S6. Impact of CXCL13 on CD8<sup>+</sup> T cell migration. Number of Th0 or Tfh cells that have migrated through the Matrigel matrix loaded in the cell culture insert. The bottom of underneath wells was loaded with CD8<sup>+</sup> cells sorted from spleen (sCD8), tumor (tCD8) supplemented or not with anti-CXCL13. Th0 or Tfh migrated cells were stained with DAPI. Indicated values represent the mean  $\pm$  SEM and are representative of at least three independent experiments; \* p < 0.05, \*\* p < 0.01, \*\*\* p < 0.001.

Fig. S7

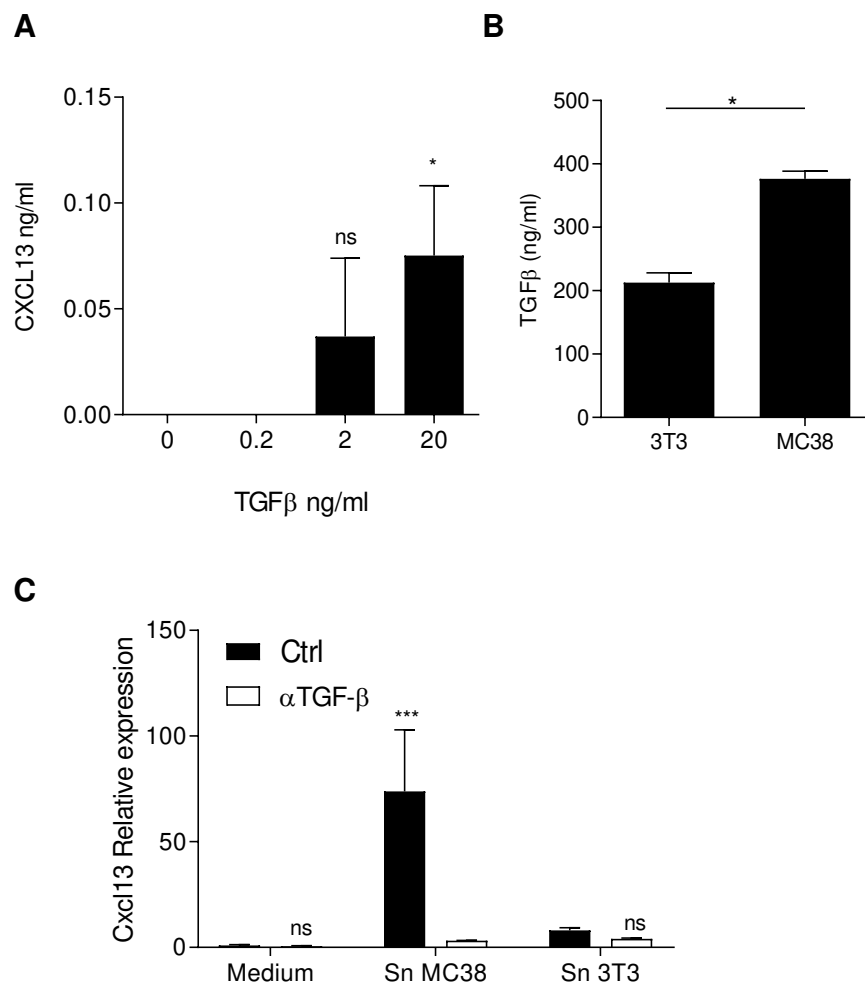

Fig. S7. Impact of TGF- $\beta$  on CXCL13. **A**, The production of CXCL13 was analyzed by ELISA in supernatant of CD8<sup>+</sup> T cells activated with anti-CD3 / CD28 and treated by an increased dose of TGF- $\beta$  for 72 hours. **B**, The production of TGF- $\beta$  was analyzed by ELISA in MC38 cancer cells or 3T3 fibroblast-like cell supernatants. **C**, Expression of Cxcl13 was analyzed by RT-PCR in naive CD8<sup>+</sup> T cells activated with anti-CD3 / CD28 alone (medium) or with supernatant of MC38 or 3T3 cell lines for 48 hours. Indicated values represent the mean  $\pm$  SEM and are representative of at least three independent experiments; ns: not significant, \*  $p < 0.05$ , \*\*\*  $p < 0.001$  versus “0” in **A** and versus Ctrl in **C**.

Fig. S8

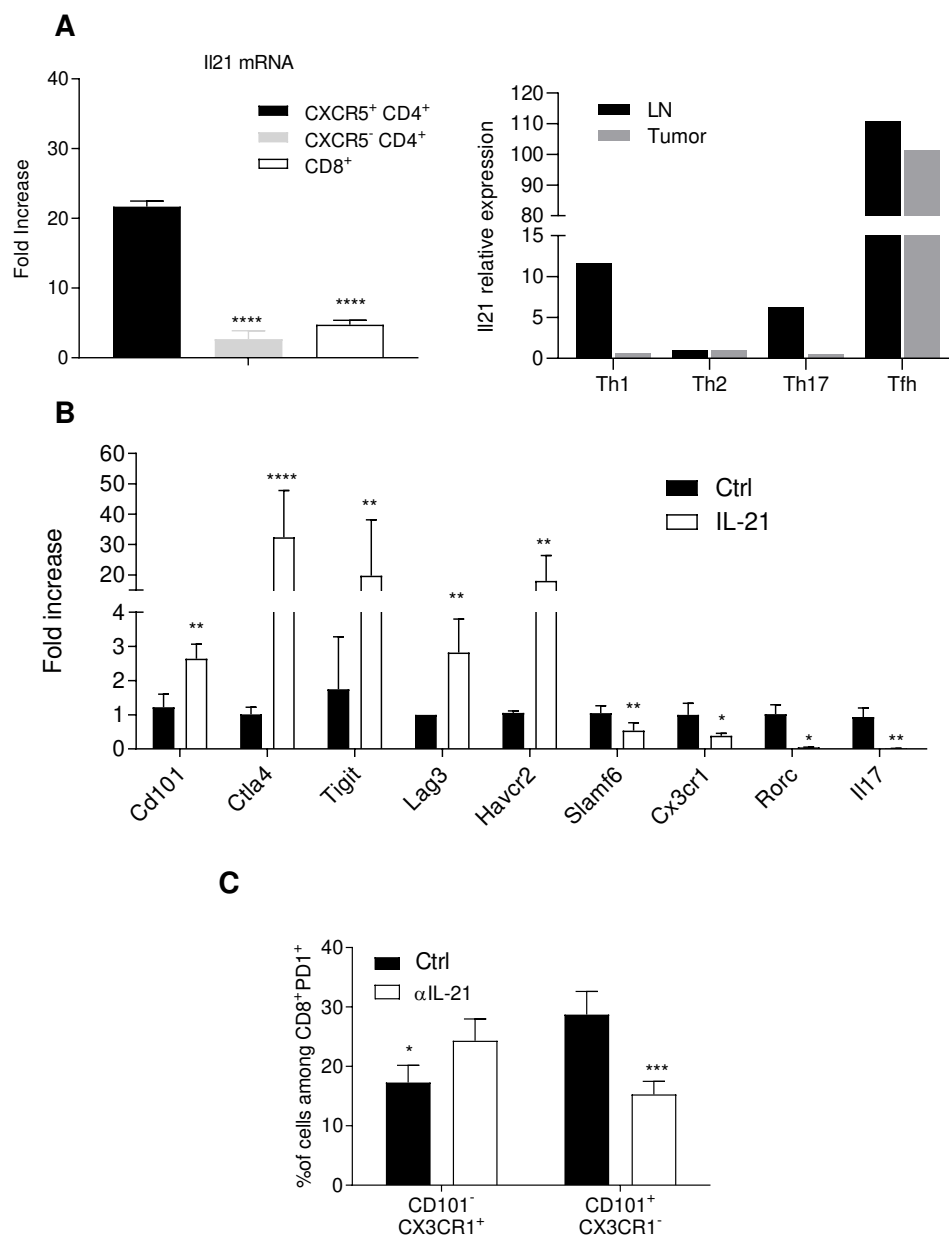

Fig. S8. IL-21 production by Tfh cells and IL-21 effect on CD8 differentiation. **A**, Expression of Il21 was analyzed by RT-PCR in Tfh (CXCR5<sup>+</sup>CD4<sup>+</sup>), CXCR5<sup>-</sup>CD4<sup>+</sup>, CD8<sup>+</sup> T cells (left panel – relative to CXCR5<sup>-</sup>CD4<sup>+</sup>) and in Th1, Th2, Th17 and Tfh cells (right panel – relative to Th2) from tumors of MC38 tumor bearing mice. **B**, Expression assessed by RT-PCR of



Cd101, Ctla4, Tigit, Lag3, Havcr2, Slamf6, Cx3cr1, Rorc and Il17 in naive CD8<sup>+</sup> T cells activated by anti-CD3 / CD28 stimulation and treated or not (Ctrl) with recombinant IL-21 (20ng/ml) for 48 hours. The relative gene expression was normalized to Actb. **C**, Analysis of CD101 and CX3CR1 markers by flow cytometry in CD8<sup>+</sup>PD1<sup>+</sup> cells from tumor of MC38 tumor bearing mice treated or not with anti-IL-21 antibody. Indicated values represent the mean  $\pm$  SEM and are representative of at least three independent experiments; ns: not significant, \*  $p < 0.05$ , \*\*  $p < 0.01$ , \*\*\*  $p < 0.001$ , \*\*\*\*  $p < 0.0001$ , versus “CXCR5<sup>+</sup>CD4<sup>+</sup>” in **A** and versus Ctrl in **B and C**.

Fig. S9

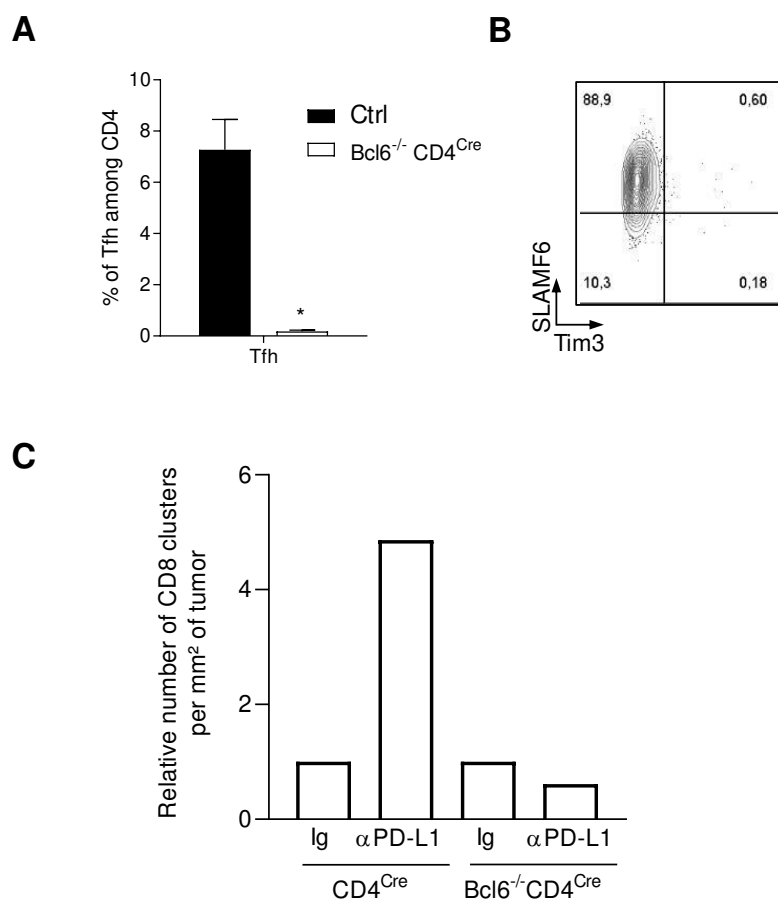

Fig. S9. Tfh cell amount in Bcl6<sup>-/-</sup> CD4<sup>Cre</sup> mice and exhaustion marker expression in OTI CD8<sup>+</sup> T cells. **A**, Percentage of Tfh cells measured by flow cytometry in CD4<sup>Cre</sup> mice and Bcl6<sup>-/-</sup> CD4<sup>Cre</sup> mice. Indicated values represent the mean ± SEM and are representative of at least three independent experiments,\* p < 0.05, versus Ctrl. **B**, SLAMF6, and Tim3 expression analyzed by flow cytometry in OTI CD8<sup>+</sup> PD-1<sup>+</sup> T cells activated for 3 days by anti-CD3 / CD28. **C**, MC38 tumor sections were stained with anti-CD8 antibodies and analyzed by immunohistochemistry. Values represent the relative number of CD8 T cell clusters per mm<sup>2</sup> on the tumor section.

Fig. S10

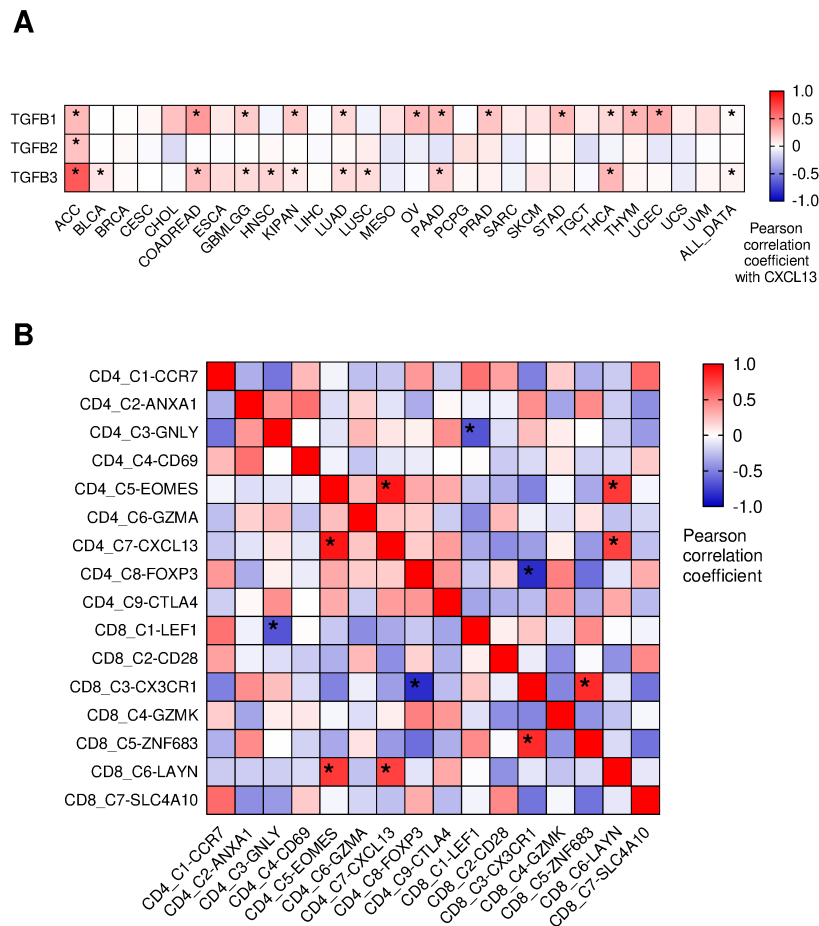

Fig. S10. Analysis of the correlation between CXCL13 and TGF $\beta$  genes and between immune cell clusters. **A.** Heat map showing the Pearson correlation coefficients between CXCL13 and different genes representative of TGF $\beta$  (TGFB1, TGFB2 and TGFB3) in each type of cancer provided by the TCGA. Blue cells represent a negative correlation and red cells a positive correlation between CXCL13 and each of the three genes representative of TGF $\beta$ . **B.** Heat map showing the Pearson correlation coefficients between the abundance of cells in the different clusters characterized by Guo et al. from single-cell RNAseq data\*: p-value < 0.05.

Fig. S11

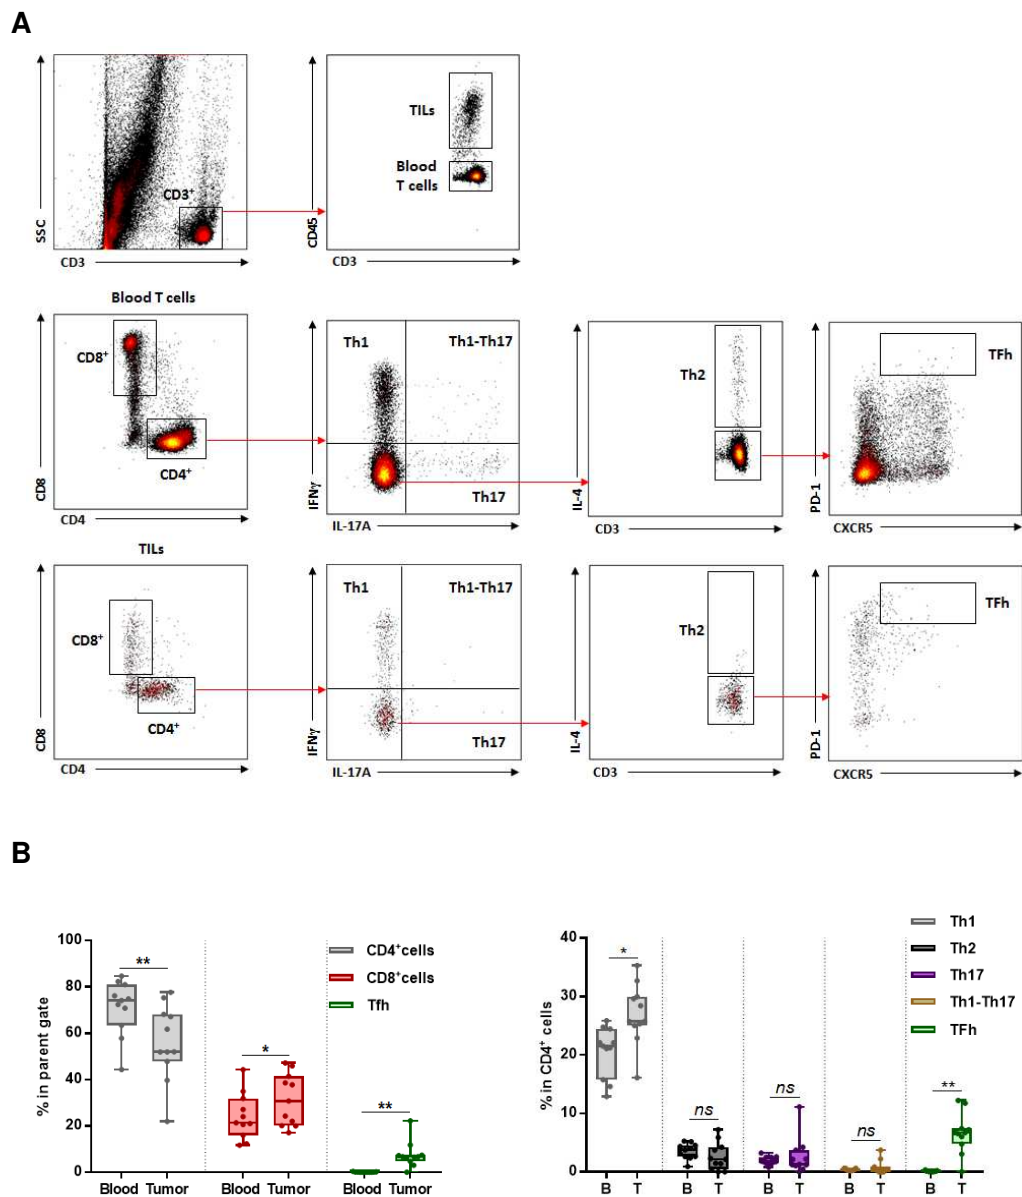

Fig. S11. Tumor samples from glioblastoma (n=2), ovarian (n=2) and breast cancer (n=7) patients were dissociated, stained with anti-CD45 and then were activated with whole blood with PMA/Iono. After activation, samples were stained with anti-IFN $\gamma$ , anti-IL-21, anti-IL-4, anti-CXCL13, anti-IL-17A, anti-CD3, anti-CD4 and anti-CD8 antibodies and analysed by flow cytometry. **A**. Flow cytometry gating strategy to identify different subtypes of CD4<sup>+</sup> T

cells and CD8<sup>+</sup> T cells in blood and tumor samples. **B.** Frequency of CD4<sup>+</sup> and CD8<sup>+</sup> T cells among CD45<sup>+</sup> T cells in blood or tumor samples and frequency of Tfh cells (CD4<sup>+</sup> CXCR5<sup>high</sup> PD1<sup>high</sup>) among CD4<sup>+</sup> T cells (left panel). Frequency of Th1 (CD4<sup>+</sup> IFN $\gamma$ <sup>+</sup> IL-17A<sup>-</sup>), Th17 (CD4<sup>+</sup> IFN $\gamma$ <sup>-</sup> IL-17A<sup>+</sup>), Th17-Th1 (CD4<sup>+</sup> IFN $\gamma$ <sup>+</sup> IL-17A<sup>+</sup>), Th2 (CD4<sup>+</sup> IFN $\gamma$ <sup>-</sup> IL-17A<sup>-</sup> IL-4<sup>+</sup>) and Tfh (CD4<sup>+</sup> IFN $\gamma$ <sup>-</sup> IL-17A<sup>-</sup> IL-4<sup>-</sup> CXCR5<sup>high</sup> PD1<sup>high</sup>) cells in blood and tumor (right panel).

Fig. S12

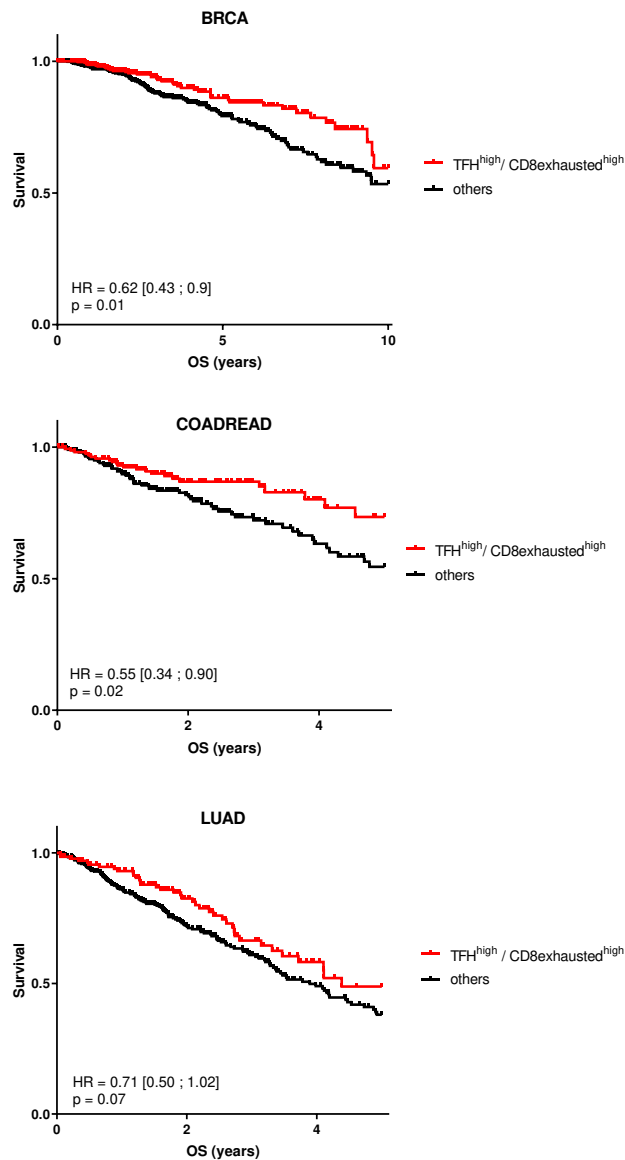

Fig. S12. Impact of Tfh/exhausted CD8 metagene on cancer patient survival. Kaplan-Meier curves of overall survival in breast invasive carcinoma (BRCA), Colon and Rectum adenocarcinoma (COADREAD) and Lung adenocarcinoma (LUAD). Red curves represent patients with high expression of Exhausted CD8<sup>+</sup> metagene and Tfh metagene and black curves patients with at least one metagene with low expression.

Fig. S13

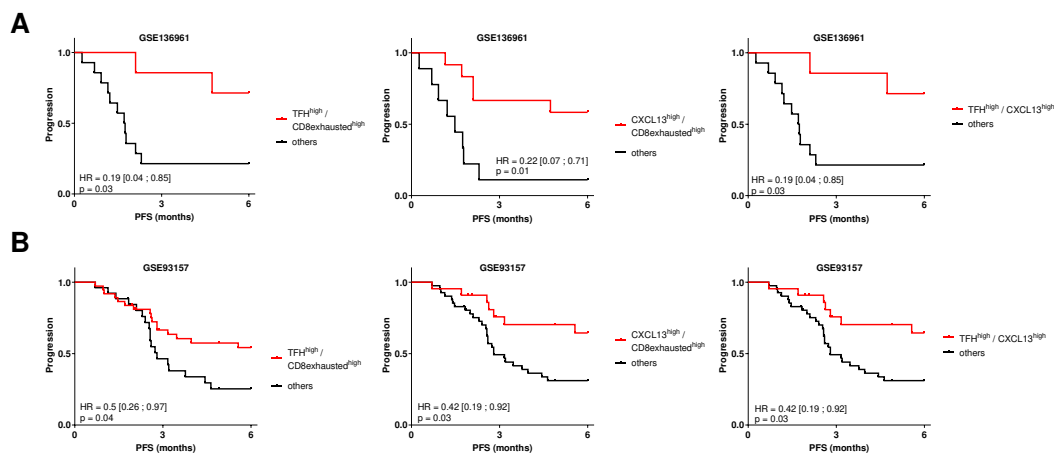

Fig. S13. Impact of Tfh/exhausted CD8 metagene and CXCL13 on cancer patient progression-free survival. Kaplan-Meier survival analysis for progression-free survival estimated for patients from GSE136961 (A) and GSE93157 (B). Red curves represent patients with high expression of two metagenes among Tfh, CXCL13 and Exhausted CD8<sup>+</sup> T cells and black curves represent other patients.

Table S1: Antibodies used in flow cytometry experiments on mice

| Target                                  | Fluorochrome           | Lot Number | Supplier       |
|-----------------------------------------|------------------------|------------|----------------|
| CD45                                    | BV395                  | 30-F11     | BD Biosciences |
| CD8                                     | BUV805                 | 53-6.7     | BD Biosciences |
| PD1                                     | Vioblue                | HA2-7B1    | Miltenyi       |
| TIM-3                                   | PE-Cy7                 | RMT3-23    | Biolegend      |
| Lag3                                    | BV650                  | C9B7W      | Biolegend      |
| Tigit                                   | APC-R700               | 1G9        | BD Horizon     |
| Granzyme B                              | PE                     | REA-226    | Miltenyi       |
| TNF $\alpha$                            | BV510                  | MP6-XT22   | Biolegend      |
| IL-2                                    | FITC                   | JES6-5H4   | Biolegend      |
| IFN $\gamma$                            | APC                    | XMG1.2     | BD Biosciences |
| Ki67                                    | BV510                  | B56        | BD Biosciences |
| CD45                                    | Viogreen               | REA737     | Miltenyi       |
| CD4                                     | BUV805                 | GK1.5      | BD Biosciences |
| CXCR3                                   | APC                    | REA724     | Miltenyi       |
| ST2                                     | PE                     | DJ8        | MD Bioproducts |
| CCR6                                    | PE-Vio770              | REA277     | Miltenyi       |
| CXCR5                                   | BV421                  | L138D7     | Biolegend      |
| PD1                                     | FITC, PE               | REA802     | Miltenyi       |
| B220                                    | APC-Cy7                | RA3-6B2    | BD             |
| FoxP3                                   | PerCP                  | FJK-16S    | Invitrogen     |
| SLAMf6                                  | PE, Fitc               | 13G3       | Miltenyi       |
| CX3CR1                                  | BV711                  | SA011F11   | BD Biosciences |
| CD45                                    | Viogreen               | REA737     | Biolegend      |
| BCL6                                    | PE-Cya7                | K112-91    | BD Biosciences |
| CD25                                    | Fitc                   | 7D4        | BD Biosciences |
| CD45r                                   | APC-Cy7                | RA3-6B2    | BD Biosciences |
| CD278                                   | Alexa Fluor 6477E.17G9 |            | BD Biosciences |
| CD11b Fitc                              | Fitc                   | M1/70      | BD Biosciences |
| CD11c Apc                               | Apc                    | HL3        | BD Biosciences |
| CD19                                    | APC-Cy7                | 1D3        | BD Biosciences |
| CD45.1                                  | Fitc                   | A20        | Biolegend      |
| CD45.2                                  | BV510                  | 104        | Biolegend      |
| Fixable Viability Dye eFluor™ 780       |                        |            | Invitrogen     |
| BD Horizon™ Fixable Viability Stain 700 |                        |            | BD             |



Table S2: Primers used for RT-qPCR experiments

|            | Fw                     | Rev                     |
|------------|------------------------|-------------------------|
| Ascl2      | TCCATCAAGCTTGCATTGAG   | GAAGGTGCAAACGTCCACTT    |
| Actb       | ATGGAGGGGAATACAGCCC    | TTCTTTGCAGCTCCTTCGTT    |
| Bcl6       | AAAGGCCGGACACCAGTTTT   | TCACGGGGAGGTTTAAGTGC    |
| Blimp1     | GCAAAGAGGTTATTGGCGTGGT | CAGGCAGCCAGGTTTTGCTC    |
| Cx3cr1     | CCATCTGCTCAGGACCTCAC   | CACCAGACCGAACGTGAAGA    |
| Cxcl13     | TTGTGTAATCGGCTTCCACA   | ACGTTGAACTCCACCTCCAG    |
| Cxcr5      | GCTGCAGCTATGAACTACCCA  | CAGTTCCTTGTACAGGTCATCCA |
| Cxcr5      | GCTGCAGCTATGAACTACCCA  | CAGTTCCTTGTACAGGTCATCCA |
| Eomes      | CGGGACAACACTACGATCCATG | CTAGGGGAATCCGTGGGAGA    |
| Gata3      | AGGATGTCCCTGCTCTCCTT   | GCCTGCGGACTCTACCATAA    |
| Granzyme B | GAAGCCAGGAGATGTGTGCT   | GCACGTTTGGTCTTTGGGTC    |
| lfn3       | TGAGCTCATTGAATGCTTGG   | ACAGCAAGGCGAAAAAGGAT    |
| Il17       | TGAGCTTCCCAGATCACAGA   | TCCAGAAGGCCCTCAGACTA    |
| Il21       | AAAACAGGCCAAAAGCTGCAT  | TGACATTGTTGAACAGCTGAAA  |
| Il4        | CGAGCTCACTCTCTGTGGTG   | TGAACGAGGTCACAGGAGAA    |
| Pdcd1      | CAGGCTGGGTAGAAGGTGAG   | CATTCACTTGGGCTGTGCT     |
| Perforine  | TTGGTGGGACTTCAGCTTCC   | CCATACACCTGGCAGCAACT    |
| Rora       | CCCCTACTGTTCCCTCACCA   | TGCCACATCACCTCTCTCTG    |
| Slamf6     | AGTCACTCGTCCAATGCAGG   | AGAGTATTCGGCCTCTCTGG    |
| Tbx21      | ATCCTGTAATGGCTTGTGGG   | TCAACCAGCACCCAGACAGAG   |
| Tcf1       | CGCAGAGACTTTTCCCGGAC   | TGTTATGCAGCGGGGGTTGA    |
| Tgfb       | CAACCCAGGTCCTTCCTAAA   | GGAGAGCCCTGGATACCAC     |
| Tim3       | CCACTCCAATGTGGATAGCA   | CAAGAACCCTAACCCAGGAG    |
| Tnfa       | AGGGTCTGGGCCATAGAACT   | CCACCAGCTCTTCTGTCTAC    |
| Tox1       | GCCTCTCTGTTCCGTCTGAG   | CTCCCCGTCAAACCTGTTGC    |

Table S3: Table of metagene signatures

| Metagene                   | Genes                                           |
|----------------------------|-------------------------------------------------|
| Tfh                        | CD200, FBLN7, ICOS, SGPP2, SH2D1A, PDCD1, TIGIT |
| Exhausted CD8 <sup>+</sup> | CD244, EOMES, LAG3, PTGER4                      |
| CD8 <sup>+</sup> T cells   | CD8A, CD8B                                      |

Table S4: Log hazard ratio with confidence interval

|          | CXCL13                    | CD8 <sup>+</sup> T cells  | Exhausted CD8 <sup>+</sup> | Tfh                       |
|----------|---------------------------|---------------------------|----------------------------|---------------------------|
| ACC      | -0.767<br>[-1.524;-0.011] | -0.861<br>[-1.612;-0.109] | -0.606<br>[-1.366;0.153]   | -1.028<br>[-1.805;-0.251] |
| BLCA     | -0.421<br>[-0.757;-0.085] | -0.363<br>[-0.683;-0.043] | -0.598<br>[-0.893;-0.304]  | 0.264<br>[-0.05;0.577]    |
| BRCA     | -0.515<br>[-0.887;-0.143] | -0.525<br>[-0.865;-0.185] | -0.371<br>[-0.715;-0.027]  | -0.425<br>[-0.745;-0.104] |
| CESC     | -0.544<br>[-1.019;-0.07]  | -0.976<br>[-1.596;-0.355] | -0.887<br>[-1.412;-0.362]  | -0.629<br>[-1.111;-0.148] |
| CHOL     | -0.37<br>[-1.419;0.679]   | -0.311<br>[-1.308;0.686]  | -1.256<br>[-2.385;-0.127]  | -0.941<br>[-1.882;0]      |
| COADREAD | -0.586<br>[-1.011;-0.16]  | -0.448<br>[-0.875;-0.022] | -0.492<br>[-0.923;-0.062]  | -0.45<br>[-0.874;-0.027]  |
| ESCA     | -0.301<br>[-0.796;0.194]  | 0.476<br>[-0.044;0.996]   | -0.28<br>[-0.739;0.179]    | -0.244<br>[-0.697;0.21]   |
| GBMLGG   | 0.438<br>[0.178;0.697]    | 0.915<br>[0.663;1.167]    | 1.141<br>[0.835;1.446]     | 0.382<br>[0.126;0.637]    |
| HNSC     | -0.426<br>[-0.693;-0.16]  | -0.373<br>[-0.645;-0.102] | -0.362<br>[-0.652;-0.071]  | -0.535<br>[-0.806;-0.263] |
| KIPAN    | 0.895<br>[0.634;1.155]    | 0.589<br>[0.328;0.849]    | 0.691<br>[0.388;0.995]     | 0.418<br>[0.158;0.679]    |
| LIHC     | -0.206<br>[-0.552;0.139]  | -0.57<br>[-0.926;-0.214]  | -0.166<br>[-0.535;0.202]   | 0.239<br>[-0.106;0.584]   |
| LUAD     | -0.405<br>[-0.739;-0.07]  | -0.393<br>[-0.694;-0.092] | -0.325<br>[-0.623;-0.027]  | -0.237<br>[-0.558;-0.085] |
| LUSC     | -0.22<br>[-0.504;0.064]   | -0.158<br>[-0.45;0.135]   | -0.118<br>[-0.401;0.165]   | -0.286<br>[-0.579;0.007]  |
| MESO     | -0.303<br>[-0.771;0.166]  | 0.29<br>[-0.211;0.792]    | -0.388<br>[-0.858;0.081]   | -0.775<br>[-1.317;-0.232] |
| OV       | -0.482<br>[-0.775;-0.189] | -0.216<br>[-0.525;0.092]  | 0.139<br>[-0.154;0.433]    | -0.243<br>[-0.548;0.061]  |
| PAAD     | 0.19<br>[-0.226;0.606]    | 0.283<br>[-0.138;0.703]   | -0.4<br>[-0.872;0.072]     | -0.628<br>[-1.111;-0.145] |
| PRAD     | -0.625 [-1.898;0.648]     | -0.706<br>[-2.061;0.649]  | -1.223<br>[-2.783;0.337]   | -1.446<br>[-2.803;-0.09]  |
| SARC     | -0.441<br>[-0.848;-0.033] | -0.643<br>[-1.056;-0.229] | -0.48<br>[-0.887;-0.073]   | -0.442<br>[-0.855;-0.028] |
| SKCM     | -0.749<br>[-1.484;-0.015] | -0.853<br>[-1.592;-0.115] | -0.867<br>[-1.631;-0.103]  | 0.308<br>[-0.472;1.087]   |
| STAD     | -0.346<br>[-0.662;-0.03]  | 0.148<br>[-0.175;0.472]   | -0.296<br>[-0.624;0.031]   | -0.392<br>[-0.741;-0.044] |
| THCA     | -0.518 [-1.507;0.47]      | -0.745<br>[-1.733;0.244]  | -0.794<br>[-1.782;0.195]   | 0.725<br>[-0.531;1.981]   |
| UCEC     | -1.15<br>[-1.954;-0.347]  | -0.74<br>[-1.44;-0.039]   | -0.495<br>[-1.21;0.22]     | -0.554<br>[-1.255;0.147]  |
| UCS      | -0.79<br>[-1.581;0.001]   | -0.448<br>[-1.243;0.347]  | 0.741<br>[0.049;1.433]     | 0.428<br>[-0.297;1.154]   |
| UVM      | 2.069<br>[1.141;2.997]    | 2.025 [0.901;3.15]        | 1.408<br>[0.546;2.271]     | -0.448<br>[-1.338;0.441]  |
| ALL DATA | 0.209<br>[0.132;0.286]    | -0.188<br>[-0.266;-0.111] | 0.127<br>[0.045;0.208]     | -0.109<br>[-0.193;-0.026] |
| NSCL     | -0.924<br>[-1.911;0.063]  | -0.540<br>[-1.397;0.317]  | -1.037<br>[-1.874;-0.200]  | -0.331<br>[-1.180;0.518]  |
